# Supplementary material
Source: publisher figshare collection journal article supplement (https://springernature.figshare.com/ndownloader/files/21474669)
Supplement: Supplementary file 1 [file 21474669]

## Sheet: Supp. Table 1
#	Mountain group	Mountain peak	Peak elevation (m a.s.l.)	Latitude N	Longitude E	Average peak elevation (m a.s.l.)	Substrates
1	Apuane	Altissimo	1589	44.0524	10.2342	1791	Limestone
2		Corchia	1677	44.0352	10.2941
3		Grondilice	1809	44.1213	10.1919
4		Pania Croce	1858	44.0423	10.3459
5		Pisanino	1946	44.1331	10.2145
6		Pizzo D'Uccello	1781	44.1387	10.1835
7		Punta Carina (Cavallo)	1895	44.1088	10.2374
8		Sagro	1752	44.1125	10.1587
9		Sella	1739	44.0858	10.2431
10		Sumbra	1769	44.0777	10.2845
11		Tambura	1891	44.0345	10.3242
12	Tosco-Emiliano	Alpe Sigola (Bra Da Ba)	1642	44.2355	10.5747	1830	Flysch
13		Alto	1904	44.3219	10.1834
14		Alto 1 (Acuto)	1758	44.0046	10.162
15		Bocco	1770	44.3467	10.097
16		Brusa	1796	44.3763	10.04
17		Campolino	1848	44.1065	10.6469
18		Cantiere	1617	44.2715	10.6344
19		Canuti	1743	44.3512	10.1098
20		Caval Bianco	1824	44.2976	10.2963
21		Cimone	2165	44.194	10.7019
22		Cisa	1701	44.3161	10.4048
23		Corno alle Scale	1945	44.1139	10.8245
24		Curtiglia	1785	44.3843	10.0205
25		Cusna	2120	44.2881	10.392
26		Forbici	1835	44.2253	10.4382
27		Giovo	1991	44.132	10.5772
28		Giovo 1 ( Nuda)	1775	44.161	10.5791
29		Giovo 2 (Omo)	1851	44.1428	10.5531
30		Libro 2 (Cima Tauffi)	1799	44.1565	10.7445
31		Libro Aperto	1937	44.157	10.7129
32		Marmagna	1852	44.3969	9.99664
33		Civago	1740	44.2309	10.4656
34		Gennaio	1814	44.1015	10.8456
35		Gomito	1892	44.1311	10.6405
36		Lancio	1625	44.1738	10.7737
37		Prado	2054	44.2497	10.4072
38		Orsaro	1831	44.4078	9.99128
39		Pellegrino	1675	44.1975	10.4895
40		Poggio Malandrini	1662	44.0873	10.8484
41		Prampa	1698	44.3249	10.4148
42		Romecchio	1702	44.1566	10.526
43		Rondinaio	1964	44.1148	10.5948
44		Sillano	1874	44.2694	10.3506
45		Sillara	1861	44.3676	10.0629
46		Spicchio	1669	44.1822	10.5171
47		Spigolino	1827	44.1291	10.7845
48		Succiso	2017	44.333	10.1959
49		Tre Potenze	1940	44.122	10.6231
50		Vecchio	1982	44.2353	10.4135
51		Ventasso	1727	44.3714	10.2849
52	Sibillini	Amandola	1706	42.9694	13.2649	2009	Limestone
53		Argentella	2200	42.8593	13.2444
54		Cardosa	1818	42.8864	13.1283
55		Cima Vallelunga	2221	42.8921	13.242
56		Fusconi	1796	42.8183	13.1787
57		Guaidone	1647	42.7824	13.2133
58		Lieto	1944	42.842	13.1748
59		Macchiata	1751	42.7601	13.2442
60		Bove	2169	42.9183	13.2027
61		Porche	2233	42.8934	13.2196
62		Priora	2332	42.9323	13.2408
63		Sassotetto	1624	43.0053	13.2307
64		Serra	1744	42.7426	13.1779
65		Palazzo Borghese	2145	42.872	13.2273
66		Patino	1886	42.8295	13.1544
67		Pizzo Berro	2259	42.9269	13.2221
68		Prata	1745	42.8432	13.142
69		Redentore	2449	42.826	13.2536
70		Rotondo	2102	42.9637	13.1958
71		Sibilla	2173	42.901	13.2664
72		Torrone	2117	42.8443	13.2746
73		Tre Vescovi	2092	42.9516	13.2166
74		Val di fibbia	1577	43.0056	13.162
75		Vettore	2476	42.8236	13.2762
76	Laga	Cesarotta	1863	42.6962	13.3762	2197	Limestone
77		Cima Lepri	2445	42.653	13.3686
78		Laghetta	2369	42.6044	13.3893
79		Le Vene	2020	42.6882	13.3411
80		Macera Della Morte	2073	42.6942	13.3583
81		Monte di Mezzo	2155	42.5763	13.404
82		Gorzano	2458	42.6177	13.3962
83		Pelone	2057	42.6678	13.3805
84		Pizzo di Moscio	2411	42.6464	13.3986
85		Pizzo di Sevo	2419	42.6688	13.3482
86		Scalandro	1900	42.7164	13.347
87	Terminillo	Cambio	2081	42.5125	13.025	1973	Limestone
88		Cambio 2	1840	42.5272	12.9934
89		Elefante	2015	42.4656	13.026
90		Porcini	1982	42.4942	13.0115
91		Ritornello	1874	42.4786	13.0396
92		Sassetelli	2105	42.484	12.9839
93		Terminilletto	2085	42.4674	12.9901
94		Terminillo	2217	42.4735	12.9974
95		Terminillo Apex	1560	42.4344	13.0141
96	Gran Sasso	Brancastello	2385	42.4472	13.6391	2307	Limestone
97		Camicia	2564	42.4398	13.7182
98		Cannatina	1790	42.3148	13.8121
99		Capo Serre	1740	42.3746	13.7498
100		Collenbri	1610	42.4266	13.4132
101		Corno grande	2912	42.4704	13.566
102		Corvo	2623	42.4803	13.488
103		Intertmesoli	2635	42.4727	13.5282
104		Malecoste	2421	42.4632	13.4466
105		Prena	2561	42.4423	13.6827
106		San Franco	2132	42.4666	13.3883
107	Velino-Sirente	Duchessa	2184	42.1906	13.3449	2201	Limestone
108		Magnola	2220	42.1414	13.4572
109		Tino	1923	42.1	13.588
110		Puzzillo	2177	42.1881	13.382
111		Rotondo1	2064	42.2003	13.4806
112		Sirente	2349	42.1377	13.6098
113		Velino	2487	42.1487	13.3841
114	Majella	Acquaviva	2737	42.1019	14.1311	2218	Limestone
115		Amaro	2793	42.0873	14.0855
116		Block haus	2070	42.1449	14.1115
117		Forchetta	2616	42.0486	14.1
118		Maje orientale	2197	42.1078	14.1644
119		Majelletta	2007	42.1603	14.1208
120		Cavallo 1	2171	42.1246	14.1116
121		Morrone	2061	42.1206	13.9613
122		Morrone 2	1705	42.1772	13.888
123		Morrone Apex	1905	42.0756	14.0034
124		Porrara	2137	41.9755	14.0946
125	Simbruini	Autore	1853	41.9563	13.2049	1973	Limestone
126		Monna 1	1929	41.806	13.3711
127		Monna Crepacuore	1952	41.8354	13.361
128		Passeggio	2064	41.8012	13.4742
129		Serra Comune	1855	41.7728	13.521
130		Staffi Cotento	2015	41.9149	13.3308
131		Tarino	1959	41.9327	13.2929
132		Viglio	2156	41.8832	13.3727
133	Marsicani	Acero	1670	41.7285	13.8046	1970	Limestone
134		Amoro Opi	1862	41.7666	13.8796
135		Breccioso	1974	41.832	13.6246
136		Caprara	1998	41.8364	13.751
137		Ceraso	1805	41.8022	13.731
138		Colle Olmo	1680	41.7613	13.713
139		Colubrica	1698	41.8654	13.5675
140		Cornacchia	2003	41.7963	13.6406
141		Genziana 1	2060	41.9607	13.8763
142		Irto	2222	41.7268	13.9186
143		Irto 2	2044	41.7332	13.9336
144		La Sparvera	1998	41.8921	13.9368
145		La Terratta	2208	41.8871	13.8338
146		Longagna	1769	41.9062	13.4974
147		Manna	1930	41.8763	13.6621
148		Meta	2242	41.6906	13.9365
149		Metuccia	2105	41.6656	13.9746
150		Monte a Mare	2020	41.6415	13.9923
151		Argatone	2149	41.908	13.8125
152		Arzecca	1820	41.8118	14.0812
153		Arzecca	1820	41.8118	14.0812
154		Cavallo	1990	41.6835	13.8896
155		Cocullo	1610	42.0106	13.7644
156		Godi	2011	41.8387	13.9139
157		Monte di Scanno	1780	41.8743	13.9088
158		Genzana	2044	41.9331	13.9077
159		Greco	2285	41.8009	13.996
160		Marsicano	2253	41.8021	13.8649
161		Mattone	1960	41.809	13.9217
162		Mezzana	1791	41.9871	13.7686
163		Miglio	1711	41.9631	13.7748
164		Navetta	2060	41.8564	13.8566
165		Nero	1991	41.7198	13.8688
166		Palombo	2013	41.8436	13.8113
167		Rotella	2129	41.9248	14.0121
168		Rotondo 2	2095	41.8713	13.8448
169		Petroso	2249	41.7411	13.9116
170		Pietra Gentile	1979	41.8829	13.789
171		Pietre Rosse	1890	41.7387	13.8346
172		Rocca Altiera	2018	41.7067	13.8785
173		Rocca Genovese	1940	41.8391	13.7071
174		San Marcello	2007	41.7272	13.8517
175		Schiena Cavallo	1962	41.8261	13.7369
176		Serra Alta	1715	41.7586	13.5649
177		Serra Re	1790	41.7472	13.7582
178		Serrone	1927	41.7879	13.7032
179		Strega	1890	41.7807	13.7424
180		Tartaro	2191	41.7031	13.9277
181	Matese	Costa maltese	1560	41.4534	14.3238	1781	Limestone
182		Costa maltese 2	1550	41.4379	14.2952
183		Gallinola	1923	41.4353	14.4249
184		Miletto	2050	41.4505	14.3726
185		Mutria	1823	41.3851	14.5217
186	Picentini	Acellica	1660	40.7782	15.0036	1652	Limestone
187		Cervialto	1809	40.7794	15.1305
188		Cervialto 2	1550	40.7988	15.1279
189		Cervialto 3	1570	40.815	15.1605
190		Picciola	1575	40.7447	15.1784
191		Polveracchio	1790	40.7233	15.1292
192		Raja magra	1667	40.7877	15.082
193		Raja scannella	1527	40.7785	15.063
194		San Michele	1567	40.7996	14.8439
195		Terminio	1806	40.8415	14.9373
196	Alburni-Cervati	Cervati	1898	40.285	15.4848	1746	Limestone
197		Gelbson	1705	40.2234	15.3347
198		Mercori	1788	40.2906	15.4477
199		Motola	1740	40.3666	15.4362
200		Nuda	1704	40.5444	15.2556
201		Panormo	1742	40.5352	15.3244
202		Pedale-Fatella	1710	40.2695	15.4493
203		Urto	1680	40.546	15.2933
204	Pollino	Capanna	1810	39.9071	16.1316	1942	Limestone
205		Colle Paola	1899	39.9068	16.1046
206		Impisio	1610	39.9358	16.1
207		Malevento	1755	39.8988	16.1203
208		Manfriana	1981	39.8701	16.2727
209		Pollino	2248	39.9067	16.1892
210		Serra delle Ciavole	2130	39.9149	16.2194
211		Serra del Prete	2181	39.9181	16.1579
212		Serra di Crispo	2054	39.9366	16.2109
213		Serra Dolce Dorme	2267	39.8956	16.2152
214		Sparviero	1713	39.9197	16.3595
215		Timpa Lorenzo	1652	39.9089	16.2909
216	Orsomarso	Caccia	1744	39.6555	15.9138	1764	Limestone
217		Caramolo	1827	39.7968	16.0923
218		Magara	1699	39.7907	16.0576
219		Montea	1785	39.6613	15.9418
220		Mula	1935	39.7042	15.981
221		Muletta	1699	39.691	15.9881
222		Palanuda	1632	39.815	16.0092
223		Scifariello	1770	39.8076	16.0654
224		Scifariello 2	1785	39.7972	16.0711
